# Supplementary material for: Relationship between Depression Symptoms and Different Types of Measures of Obesity (BMI, SAD) in US Women
Source: Hindawi journal article supplement (doi:10.1155/2020/9624106), 2020-11-22

## Figure legends

**Figure S1.** Forest plot showing the odds ratios, confidence intervals, and P-value for interaction of SAD and depression in the different groups.

**Figure S2.** Forest plot showing the odds ratios, confidence intervals, and P-value for interaction of SAD and moderate depression in the different groups.

**Figure S3.** Forest plot showing the odds ratios, confidence intervals, and P-value for interaction of SAD and moderate severe depression in the different groups.

**Figure S4.** Forest plot showing the odds ratios, confidence intervals, and P-value for interaction of SAD and severe depression in the different groups.

(S1)

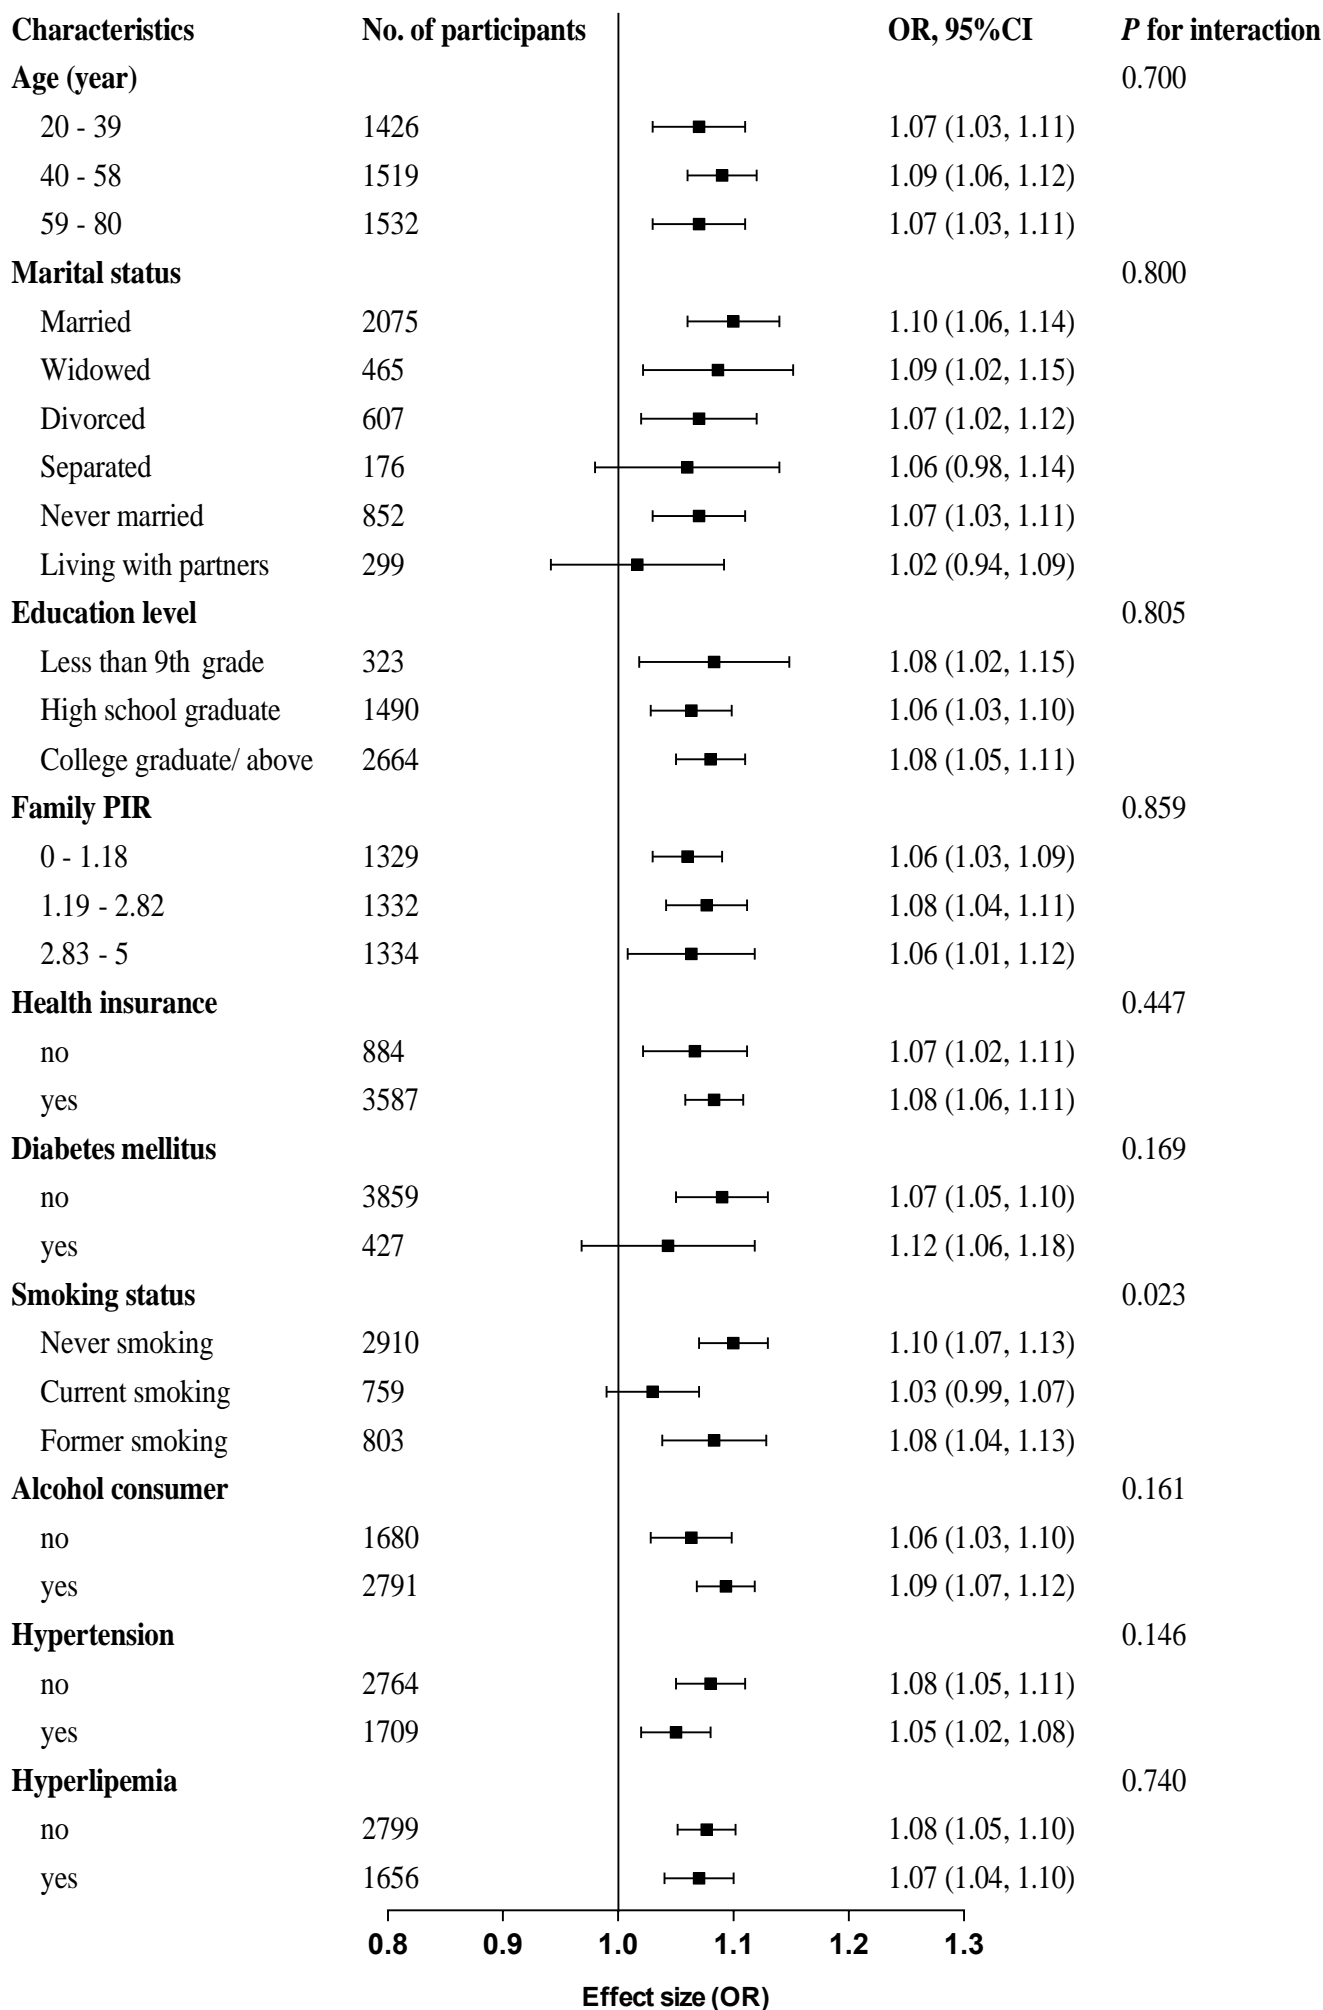

(S2)

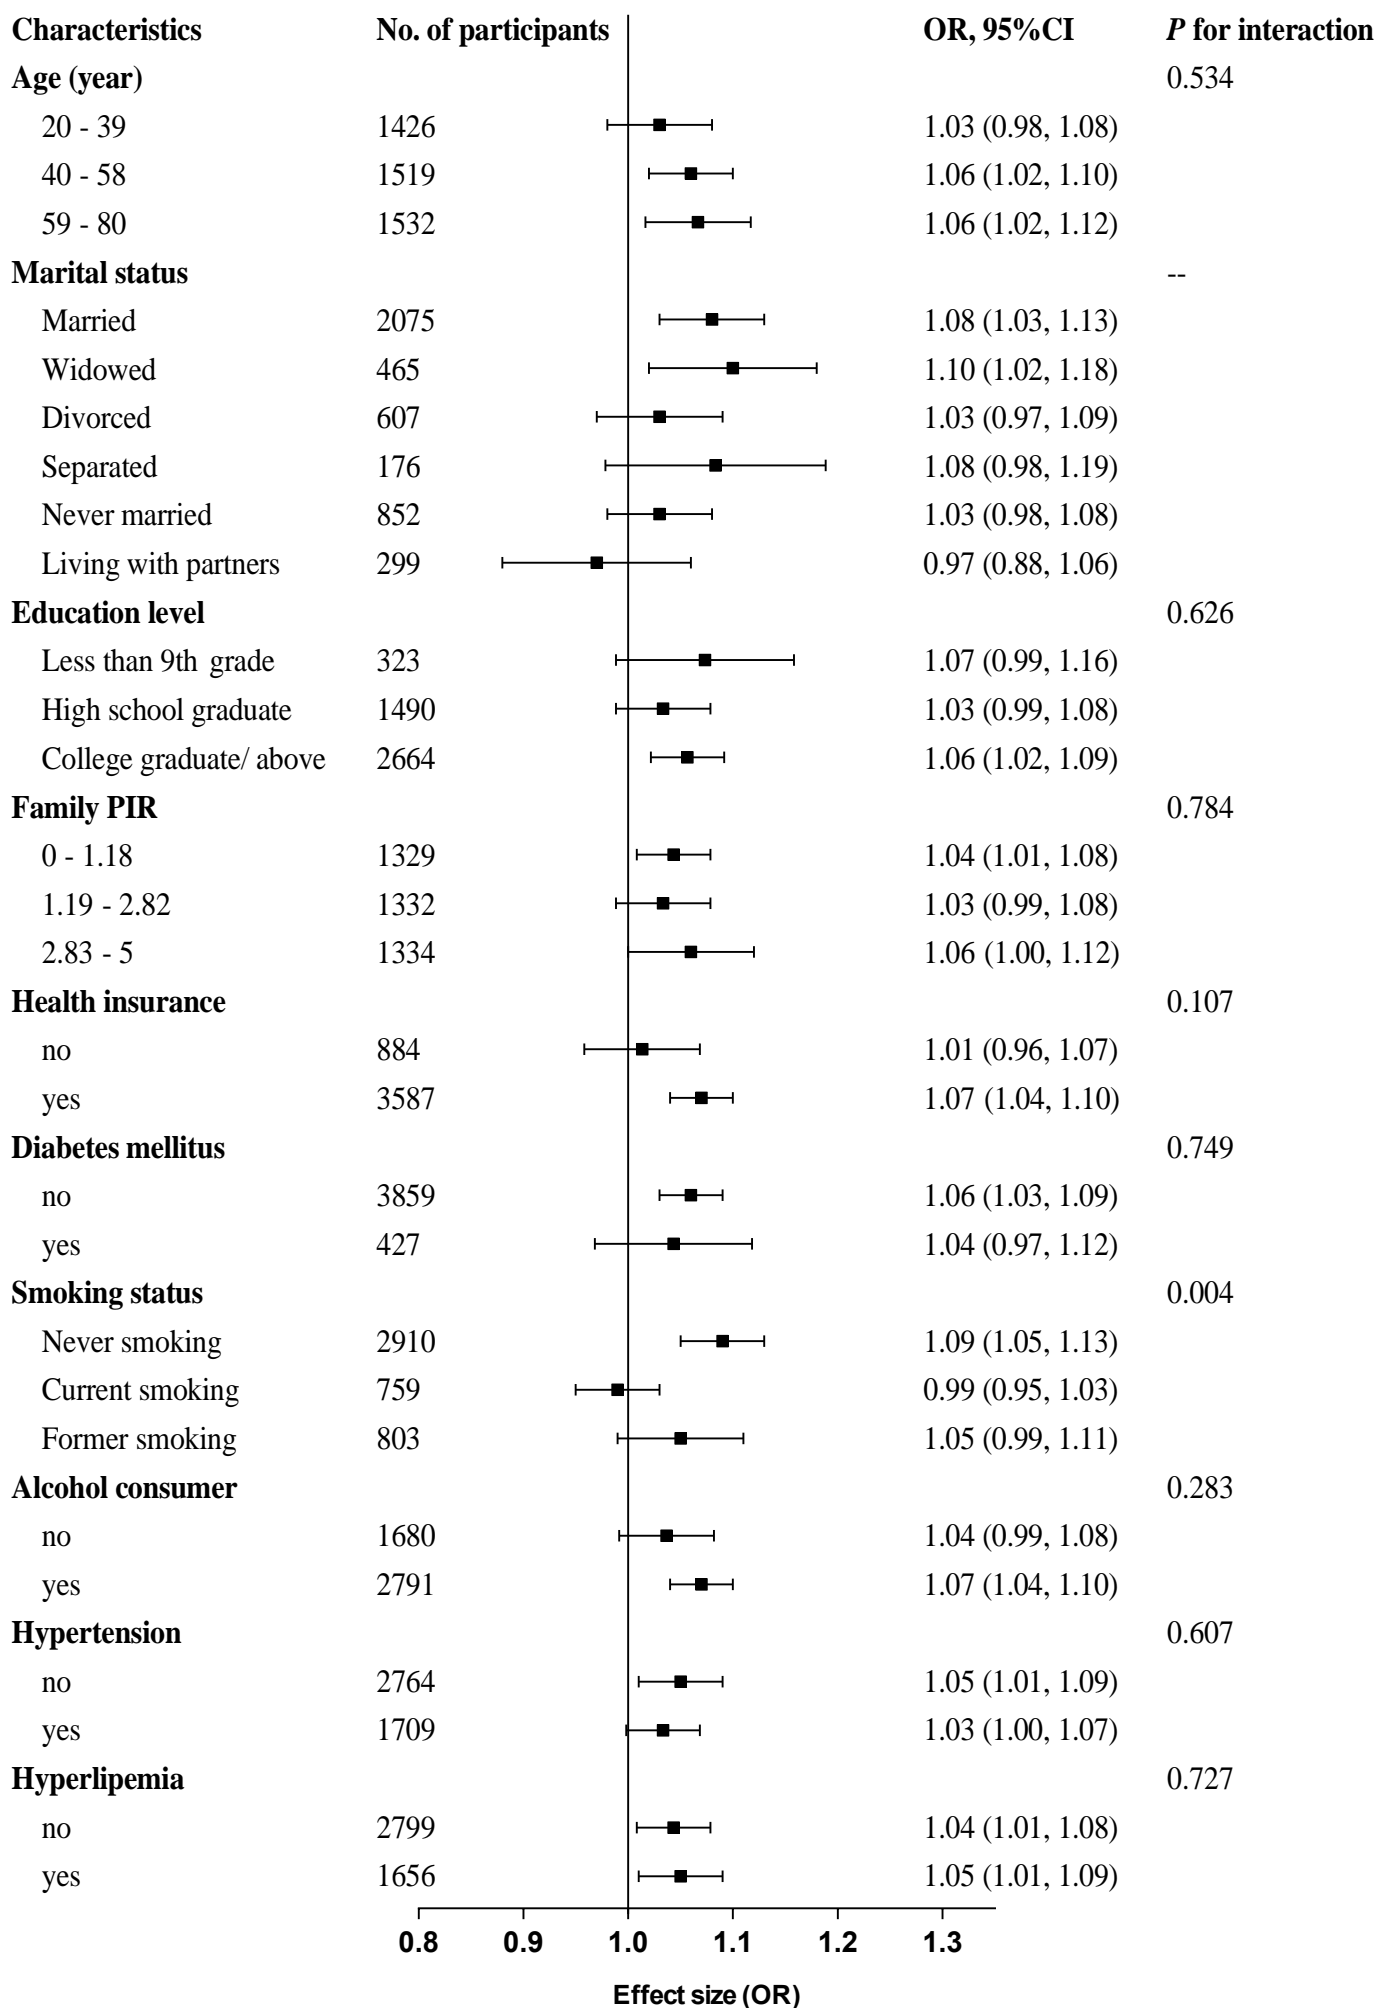

(S3)

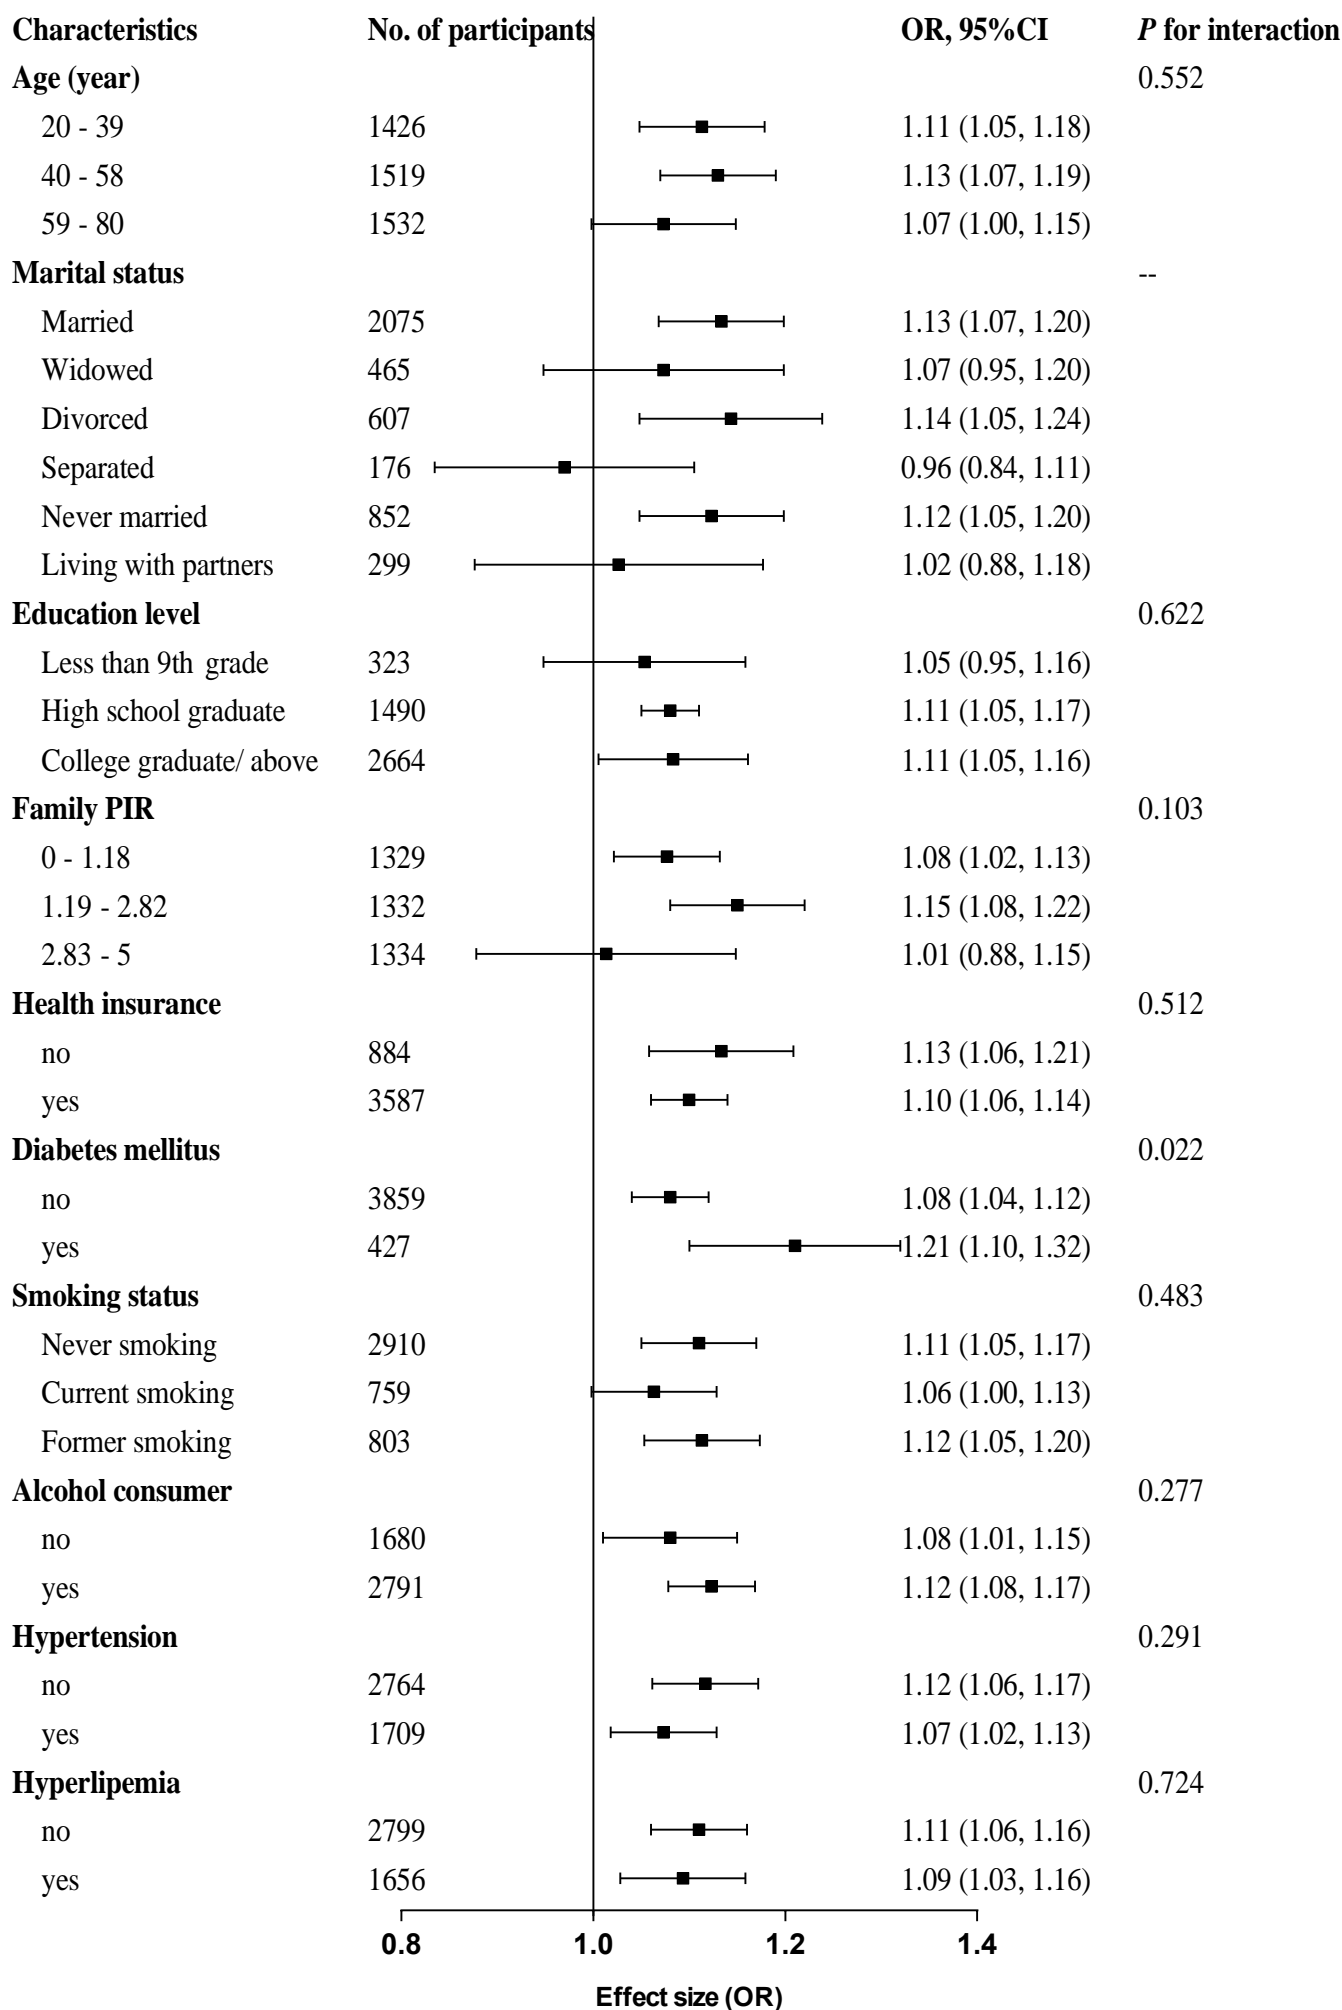

(S4)

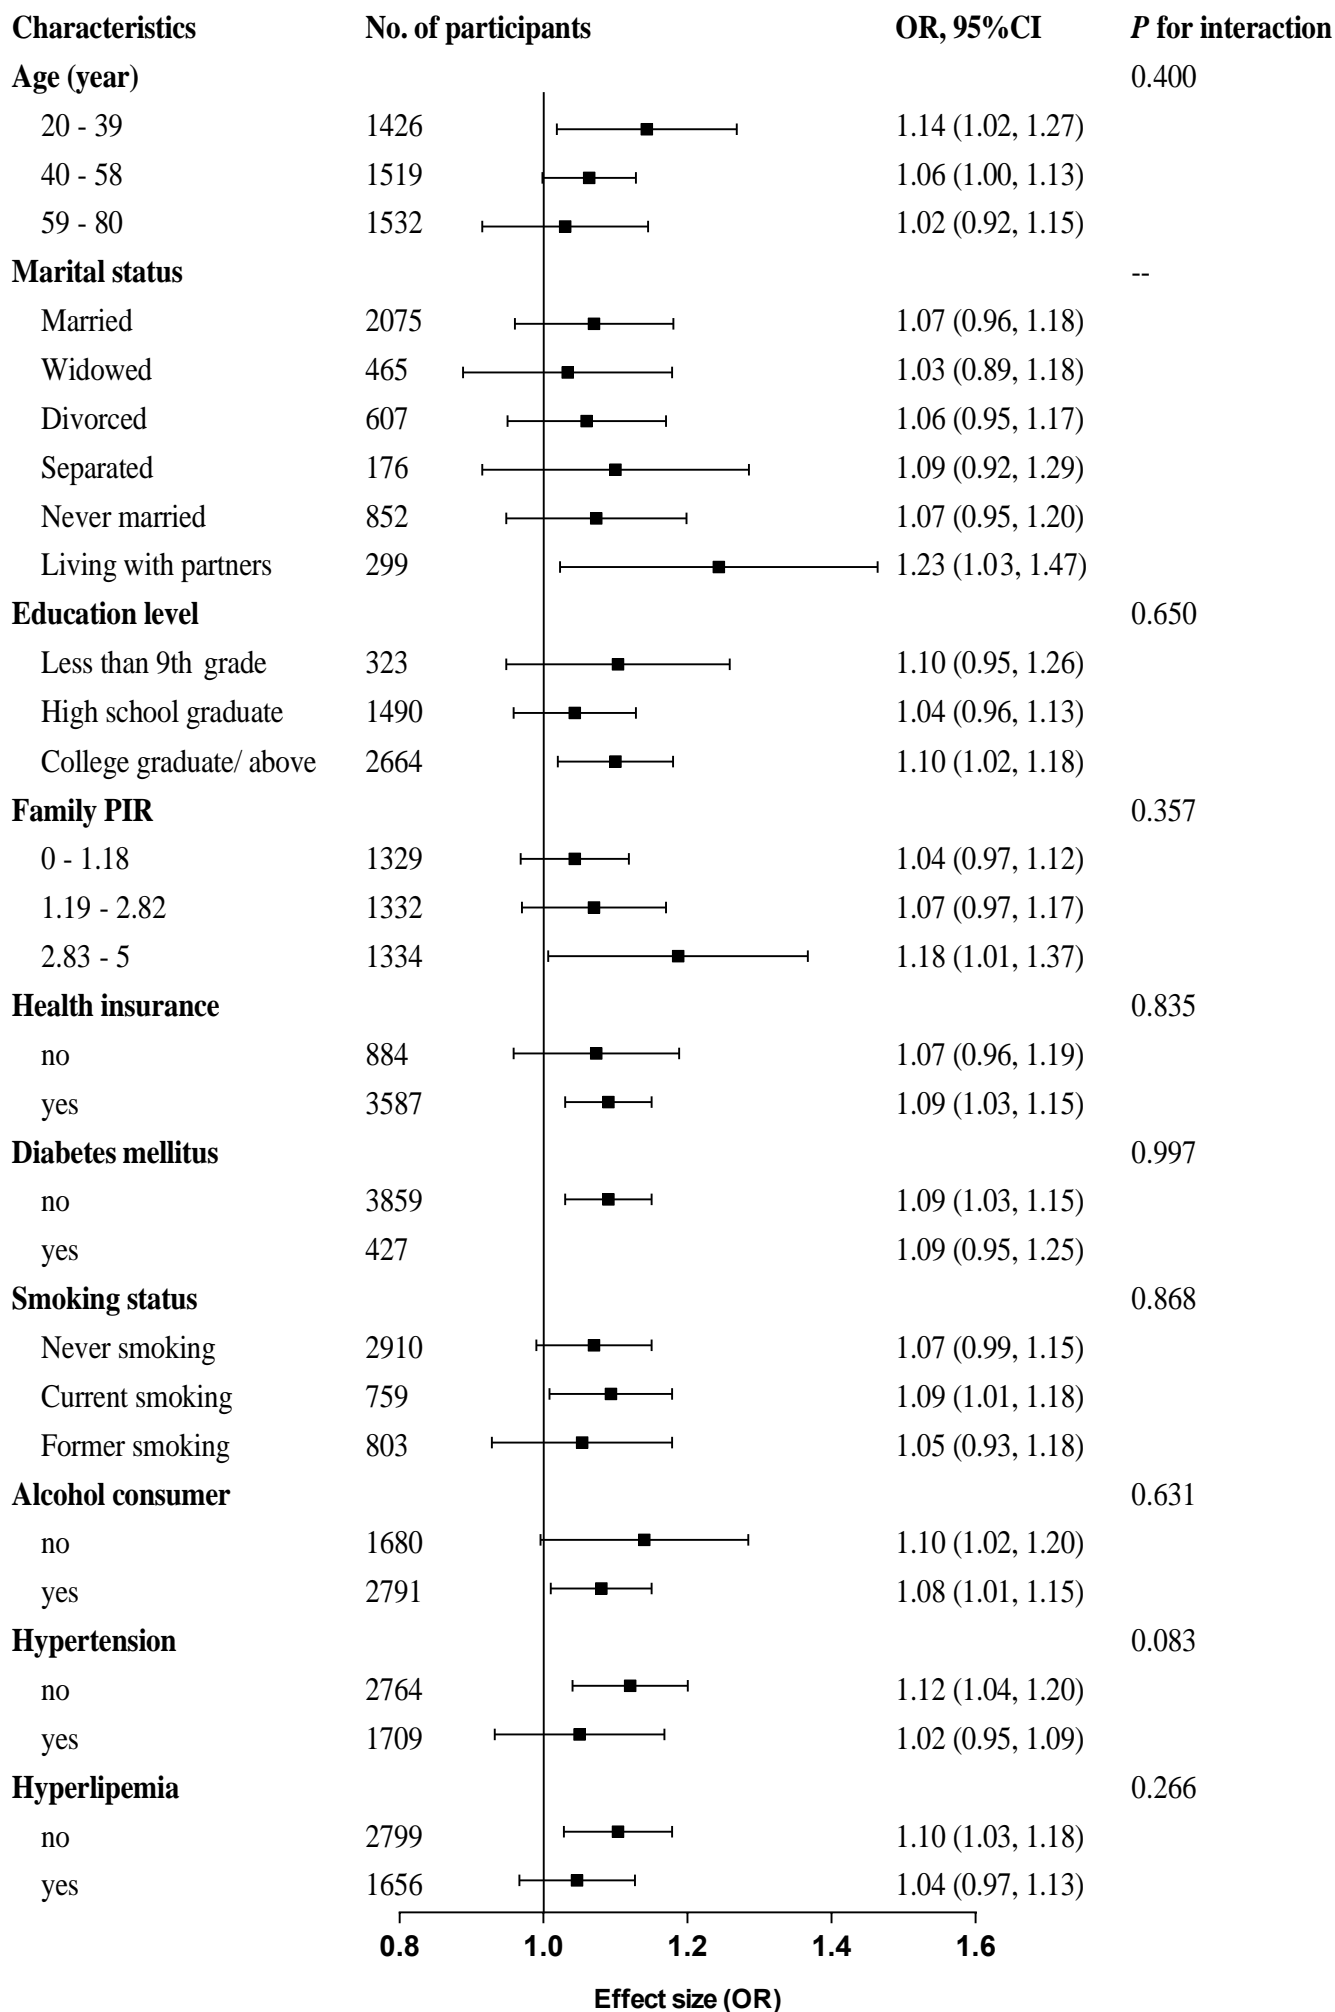

Supplement: f2 [file 9624106.f2.pdf]
